# Supplementary material for: Enzymatic production of clickable and PEGylated recombinant polyhydroxyalkanoates
Source: Royal Society of Chemistry journal article supplement (doi:10.1039/c7gc01872j), 2017-01-01
Supplement: c7gc01872j1.pdf [file c7gc01872j1.pdf]

## Two-step bioproduction of functional polyhydroxyalkanoates

### Electronic Supplementary Information

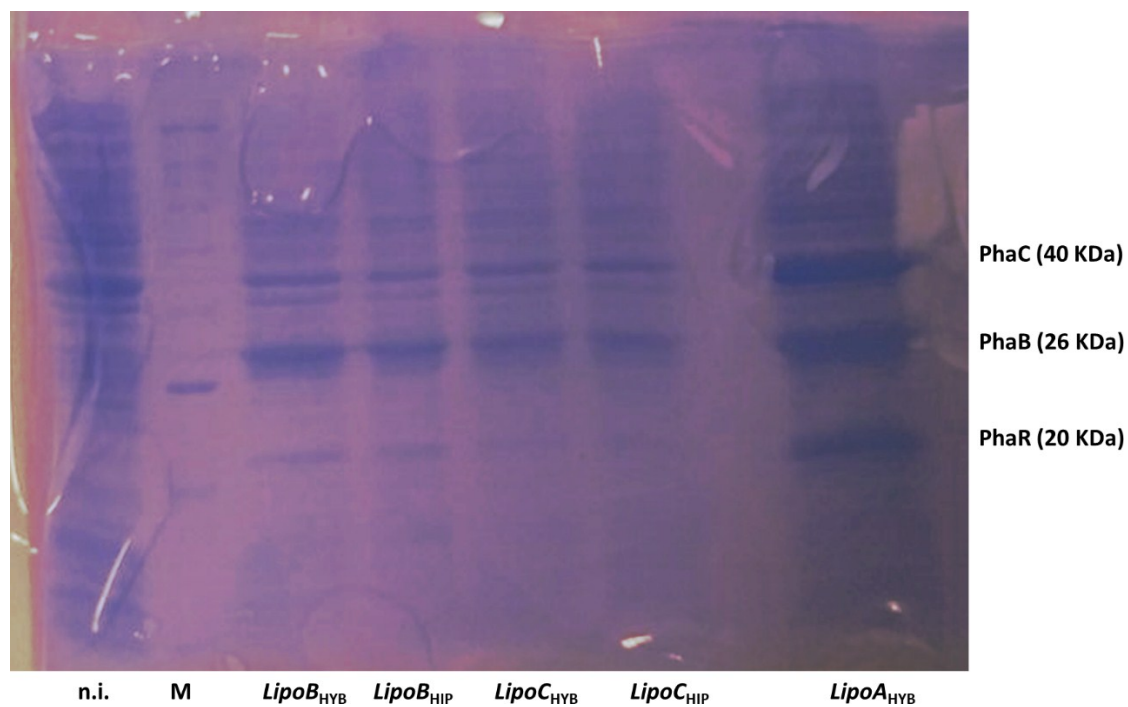

**Fig. S1** SDS-PAGE of cell extract of *LipoB* (for *tac* based systems) and *LipoA*.

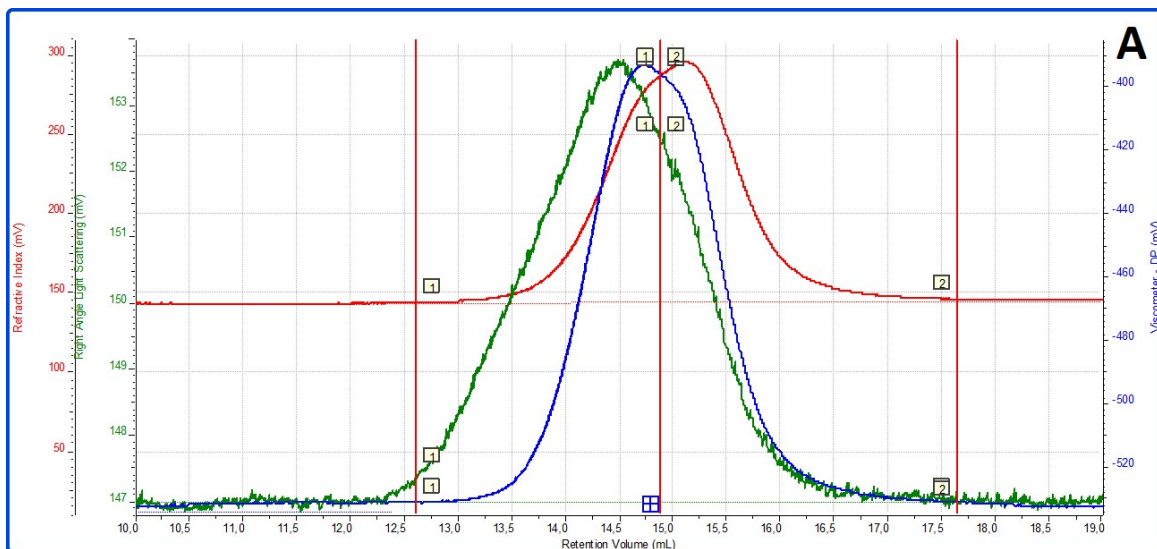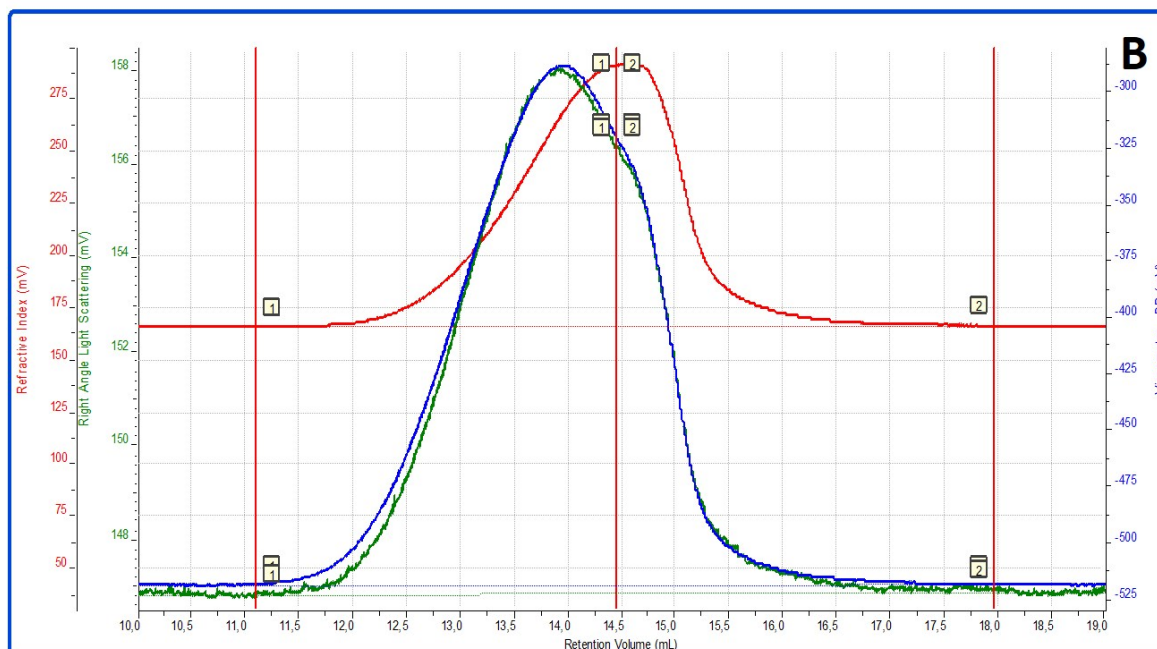

**Fig. S2** GPC chromatograms of *LipoB-HYB* polymer (A) and *LipoB-HIP* (B) polymer.

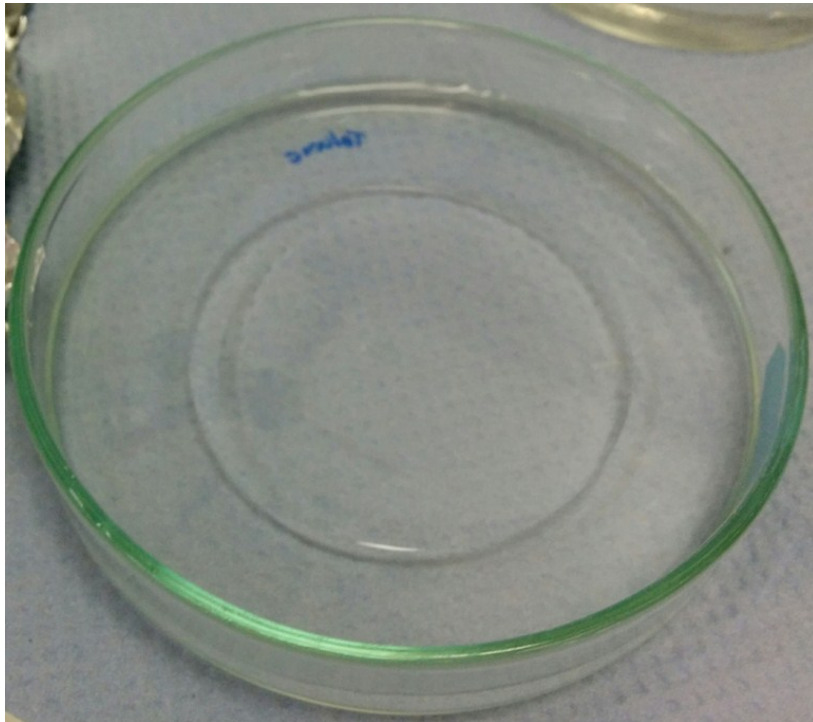

**Fig. S3** Film forming toluene solution floating on water surface.

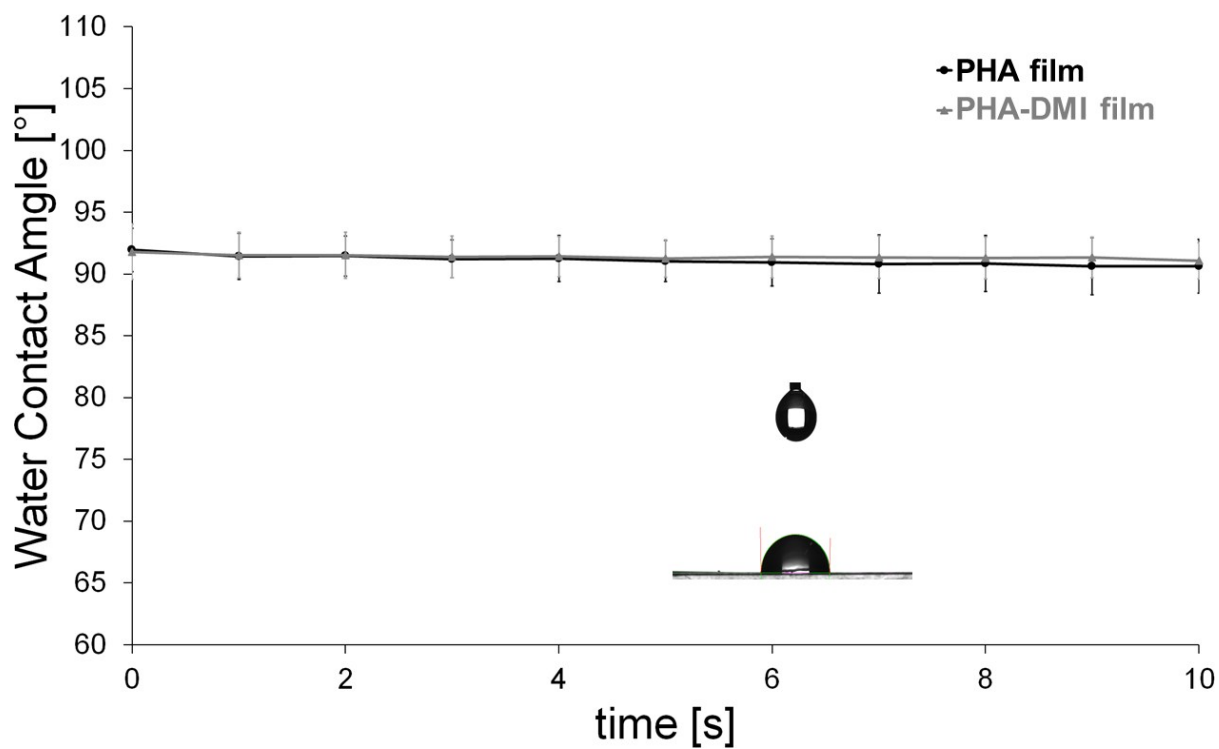

**Fig. S4** WCA analysis of PHA (black line) and PHA-DMI<sub>1</sub> (grey line) films. Frame at deposition time of water drop on PHA film was reported in picture.

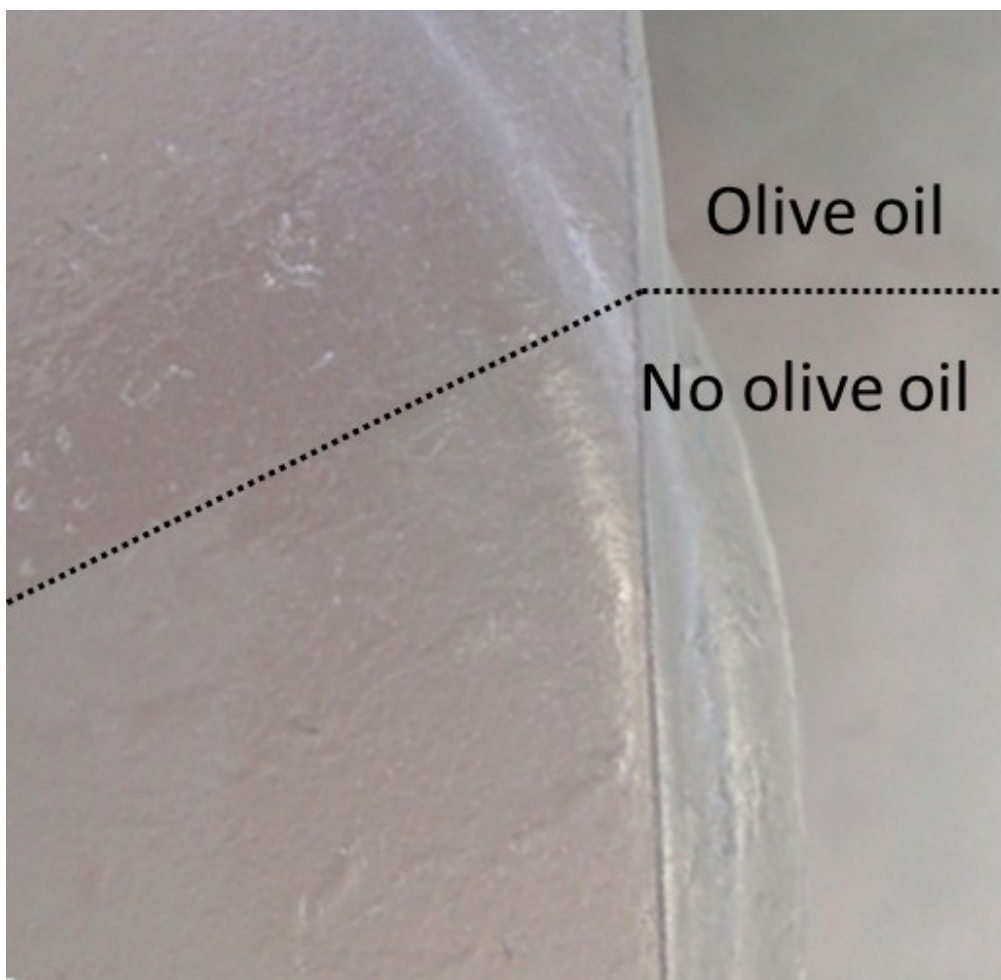

**Fig. S5** Oil-adsorbing properties of PHBHHx film. On the top film treated with olive oil. After 5 minutes the oil drop was completely adsorbed by the film which became shiny while on the bottom, far from the oil drop the film is still opaque.

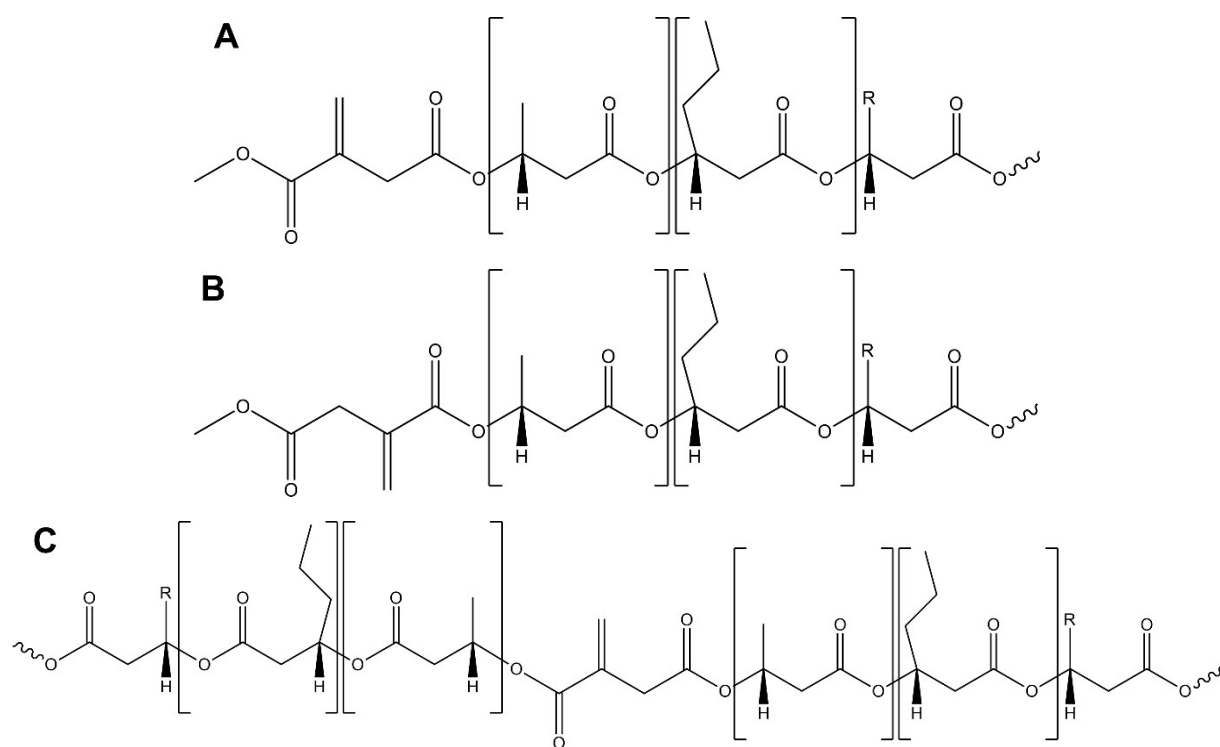

**Fig. S6** Structures of the products of PHA-DMI1 reaction: **A**: PHA capped with DMI reacted with “*fast*” carbon moiety; **B**: PHA capped with DMI reacted with “*slow*” carbon moiety; **C**: PHA dimeric species.

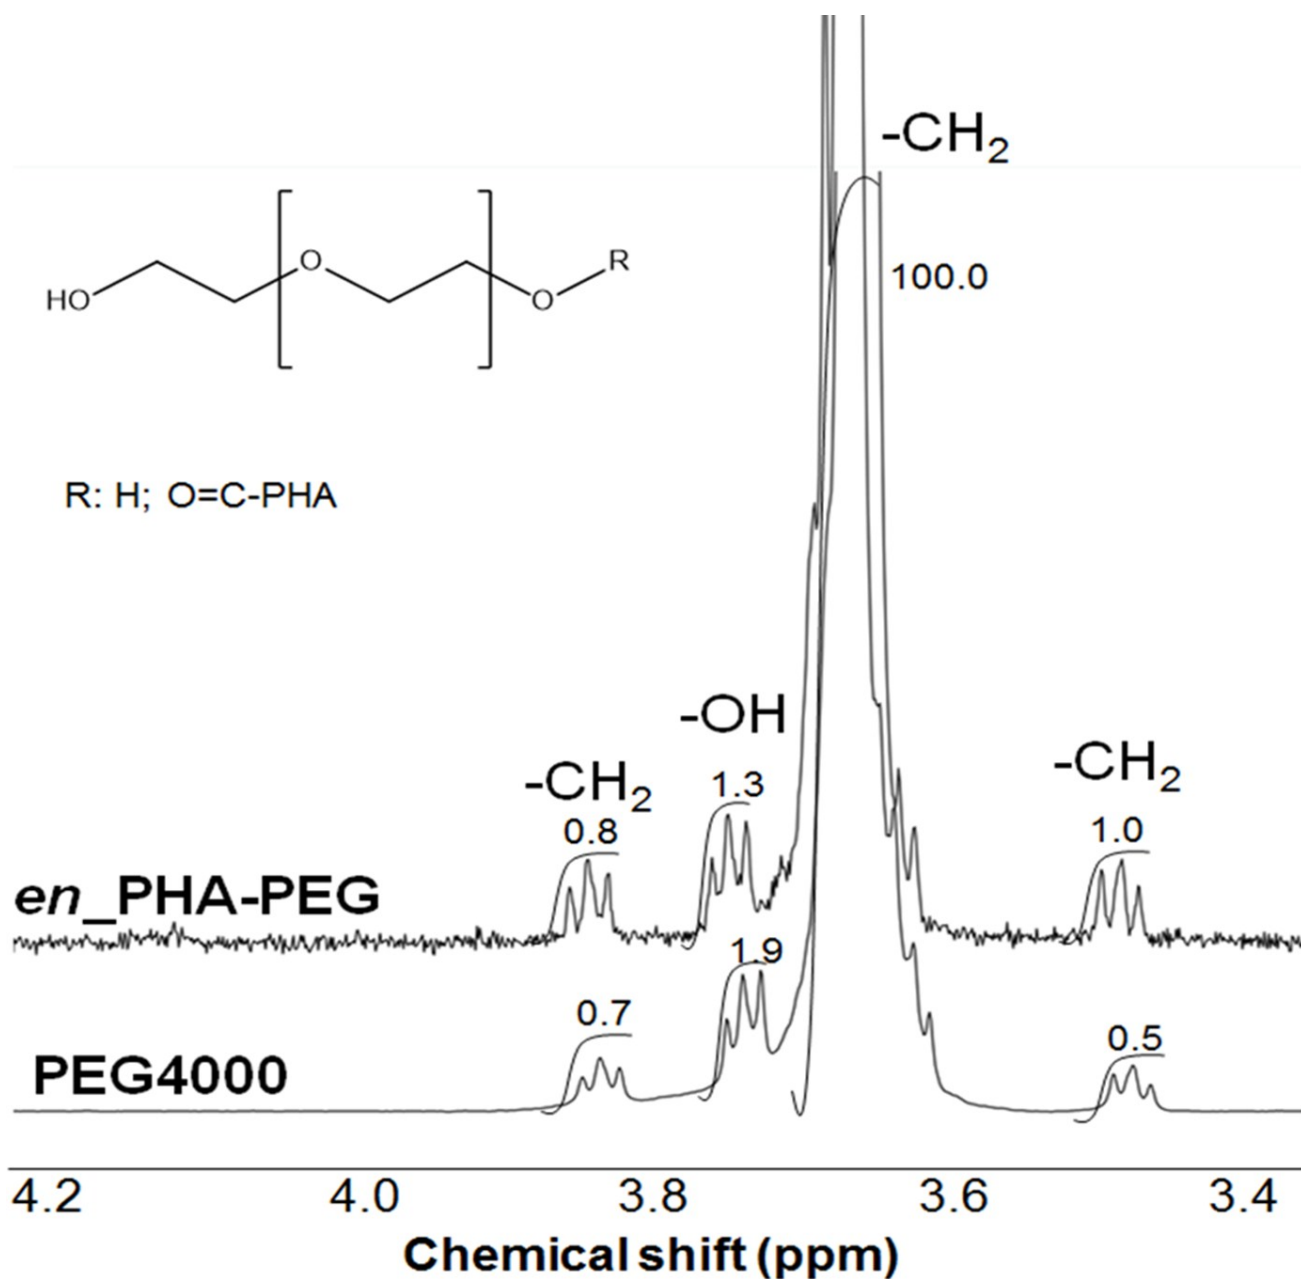

**Fig. S7** Enlarged  $^1\text{H-NMR}$  spectrum of PHA-PEG and PEG4000. *en\_PHA-PEG*: product enriched by a purification step aimed to remove most of unreacted PEG 4,000. Integration of main peak of polyether backbone was set at 100 for both samples.

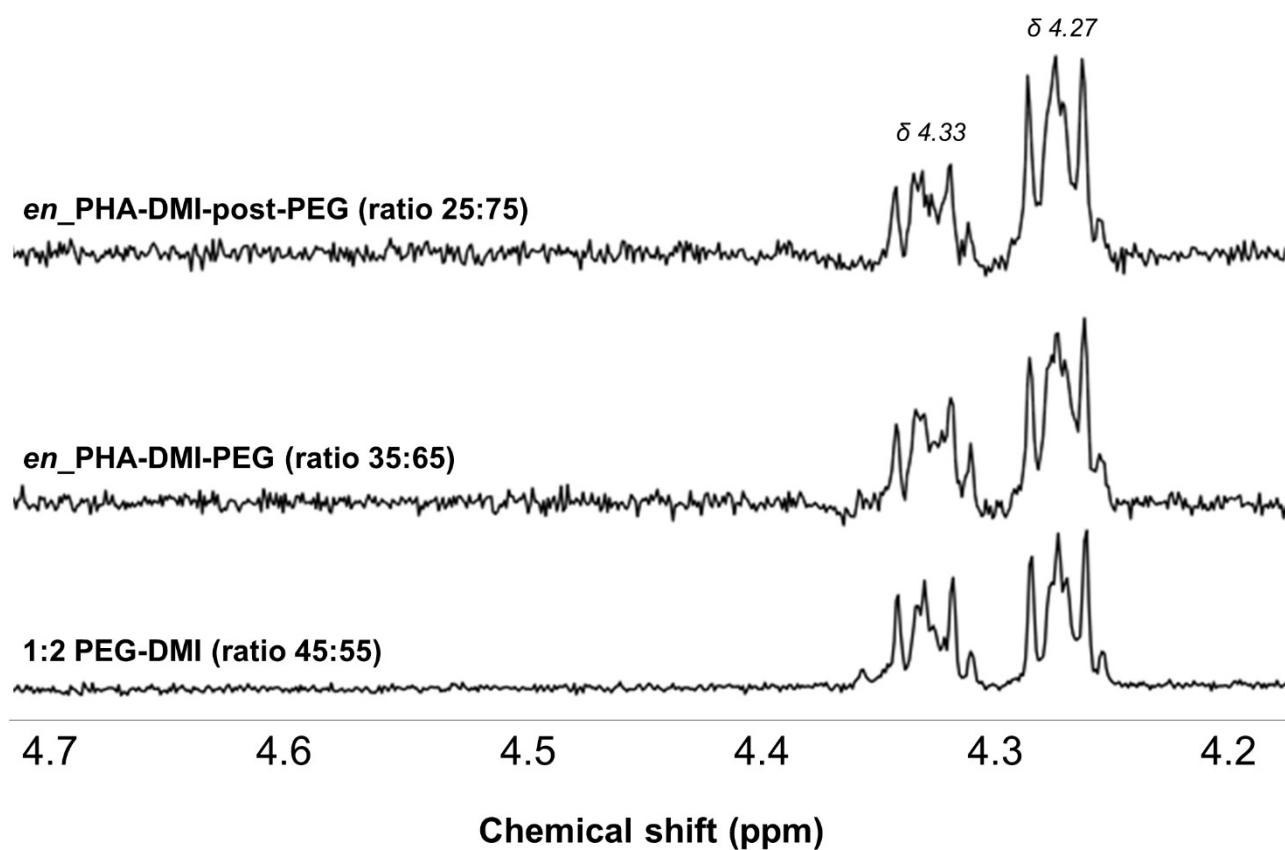

**Fig. S8** <sup>1</sup>H-NMR spectra in ester region of 1:2 PEG-DMI, *en*\_PHA-DMI-PEG and *en*\_PHA-DMI-post-PEG. Both PHA derivatives were enriched by a purification step aimed to remove most of unreacted PEG 4,000. In brackets are reported the ratios between the integration of the two ester signals at 4.33 and 4.27 ppm respectively.
